# Supplementary material
Source: publisher figshare collection journal article supplement (https://sage.figshare.com/ndownloader/files/23166680)
Supplement: Supplementary file 1 [file 23166680]

Table S1.

Regressions Predicting Coping Strategies from Attention to the Victim

| Predictor                                       | Coping response  |      |         |                   |     |         |             |     |         |                   |     |         |                      |     |         |
|-------------------------------------------------|------------------|------|---------|-------------------|-----|---------|-------------|-----|---------|-------------------|-----|---------|----------------------|-----|---------|
|                                                 | Adult assistance |      |         | Friend assistance |     |         | Retaliation |     |         | Behavioral avoid. |     |         | Internalizing coping |     |         |
|                                                 | B                | SE   | $\beta$ | B                 | SE  | $\beta$ | B           | SE  | $\beta$ | B                 | SE  | $\beta$ | B                    | SE  | $\beta$ |
| Total attention to actors                       | .88              | 1.00 | .17     | 1.89              | .88 | .34*    | -.60        | .79 | -.17    | .48               | .74 | .13     | 1.11                 | .85 | .27     |
| Attention problems                              | -.60             | .24  | -.32*   | .02               | .27 | .01     | -.07        | .19 | -.05    | .10               | .22 | .08     | -.26                 | .21 | -.18    |
| Gender                                          | .42              | .20  | .24*    | .60               | .22 | .33**   | -.38        | .19 | -.33*   | .25               | .14 | .20†    | .49                  | .14 | .37***  |
| Peer victimization (PV)                         | .31              | .21  | .30     | .20               | .31 | .19     | -.05        | .17 | -.08    | -.07              | .19 | -.10    | .24                  | .19 | .30     |
| Attention to victim                             | -.30             | .28  | -.24    | -.39              | .33 | -.30    | -.39        | .29 | -.47    | -.07              | .37 | -.08    | -.42                 | .33 | -.44    |
| Attention to victim $\times$ PV                 | -.12             | .40  | -.09    | .39               | .55 | .28     | .70         | .23 | .81**   | .12               | .37 | .13     | .20                  | .25 | .20     |
| Attention to victim $\times$ gender             | .37              | .26  | .24     | .08               | .32 | .05     | .49         | .21 | .48*    | .08               | .30 | .07     | .24                  | .29 | .20     |
| PV $\times$ gender                              | -.11             | .22  | -.08    | -.41              | .31 | -.31    | .08         | .17 | .09     | -.06              | .20 | -.06    | -.15                 | .20 | -.16    |
| Attention to victim $\times$ PV $\times$ gender | -.13             | .42  | -.09    | -.61              | .56 | -.42    | -.64        | .23 | -.68**  | -.30              | .38 | -.30    | -.20                 | .27 | -.18    |

Note. PV = Peer victimization. Behavioral avoid. = behavioral avoidance. Each attentional bias was examined in separate models and all outcomes were examined simultaneously.

†  $p < .10$ . \*  $p < .05$ . < .01. \*\*\*  $p < .001$ .

Table S2.

*Regressions Predicting Friend Assistance*

| Predictor                                                           | Seeking Friend Assistance |           |         |                       |
|---------------------------------------------------------------------|---------------------------|-----------|---------|-----------------------|
|                                                                     | <i>b</i>                  | <i>SE</i> | $\beta$ | <i>R</i> <sup>2</sup> |
| Attention to the Bully                                              |                           |           |         |                       |
| Total attention to actors                                           | .93                       | 1.36      | .17     | .14                   |
| Attention problems                                                  | -.06                      | .30       | -.03    |                       |
| Gender                                                              | .55                       | .24       | .30*    |                       |
| Peer victimization                                                  | .13                       | .31       | .12     |                       |
| Attention to bully                                                  | -.05                      | .25       | -.05    |                       |
| Attention to bully $\times$ peer victimization                      | -.14                      | .23       | -.14    |                       |
| Attention to bully $\times$ gender                                  | -.05                      | .18       | -.04    |                       |
| Peer victimization $\times$ gender                                  | -.34                      | .31       | -.26    |                       |
| Attention to bully $\times$ peer victimization $\times$ gender      | .09                       | .24       | .08     |                       |
| Attention to the Reinforcer                                         |                           |           |         |                       |
| Total attention to actors                                           | .58                       | .58       | .11     | .20                   |
| Attention problems                                                  | -.08                      | .25       | -.04    |                       |
| Gender                                                              | .56                       | .20       | .31**   |                       |
| Peer victimization                                                  | .15                       | .26       | .14     |                       |
| Attention to reinforcer                                             | .06                       | .52       | .02     |                       |
| Attention to reinforcer $\times$ peer victimization                 | -.14                      | .65       | -.04    |                       |
| Attention to reinforcer $\times$ gender                             | .86                       | .65       | .20     |                       |
| Peer victimization $\times$ gender                                  | -.43                      | .27       | -.33    |                       |
| Attention to reinforcer $\times$ peer victimization $\times$ gender | -.86                      | .73       | -.23    |                       |
| Attention to the Defender                                           |                           |           |         |                       |
| Total attention to actors                                           | .45                       | .63       | .08     | .19                   |
| Attention problems                                                  | -.08                      | .29       | -.04    |                       |
| Gender                                                              | .56                       | .23       | -.31*   |                       |
| Peer victimization                                                  | .19                       | .29       | .18     |                       |
| Attention to defender                                               | -.01                      | .35       | .00     |                       |
| Attention to defender $\times$ peer victimization                   | .51                       | .60       | .16     |                       |
| Attention to defender $\times$ gender                               | .79                       | .50       | .18     |                       |
| Peer victimization $\times$ gender                                  | -.41                      | .28       | -.31    |                       |
| Attention to defender $\times$ peer victimization $\times$ gender   | -.97                      | .68       | -.25    |                       |

\*  $p < .05$ . \*\*  $p < .01$ . Each attentional bias was examined in separate models and all outcomes were examined simultaneously.

*Table S3.*  
*Regressions Predicting Behavioral Avoidance*

| Predictor                                                           | Behavioral Avoidance |           |                    |                       |
|---------------------------------------------------------------------|----------------------|-----------|--------------------|-----------------------|
|                                                                     | <i>b</i>             | <i>SE</i> | $\beta$            | <i>R</i> <sup>2</sup> |
| Attention to the Bully                                              |                      |           |                    |                       |
| Total attention to actors                                           | .87                  | .80       | .23                | .09                   |
| Attention problems                                                  | .09                  | .20       | .07                |                       |
| Gender                                                              | .27                  | .16       | .22 <sup>†</sup>   |                       |
| Peer victimization                                                  | -.11                 | .18       | -.15               |                       |
| Attention to bully                                                  | -.09                 | .16       | -.13               |                       |
| Attention to bully $\times$ peer victimization                      | -.11                 | .18       | -.16               |                       |
| Attention to bully $\times$ gender                                  | -.04                 | .14       | -.04               |                       |
| Peer victimization $\times$ gender                                  | -.04                 | .20       | -.05               |                       |
| Attention to bully $\times$ peer victimization $\times$ gender      | .01                  | .19       | .02                |                       |
| Attention to the Reinforcer                                         |                      |           |                    |                       |
| Total attention to actors                                           | .38                  | .47       | .10                | .11                   |
| Attention problems                                                  | .06                  | .19       | .04                |                       |
| Gender                                                              | .25                  | .14       | .20 <sup>†</sup>   |                       |
| Peer victimization                                                  | -.10                 | .17       | -.13               |                       |
| Attention to reinforcer                                             | -.13                 | .29       | -.07               |                       |
| Attention to reinforcer $\times$ peer victimization                 | .56                  | .33       | .25 <sup>†</sup>   |                       |
| Attention to reinforcer $\times$ gender                             | .36                  | .36       | .12                |                       |
| Peer victimization $\times$ gender                                  | -.08                 | .18       | -.09               |                       |
| Attention to reinforcer $\times$ peer victimization $\times$ gender | -1.02                | .40       | -.39 <sup>**</sup> |                       |
| Attention to the Defender                                           |                      |           |                    |                       |
| Total attention to actors                                           | .38                  | .43       | .10                | .12                   |
| Attention problems                                                  | .13                  | .21       | .10                |                       |
| Gender                                                              | .29                  | .15       | .24 <sup>*</sup>   |                       |
| Peer victimization                                                  | .04                  | .17       | -.06               |                       |
| Attention to defender                                               | .20                  | .32       | .12                |                       |
| Attention to defender $\times$ peer victimization                   | .90                  | .44       | .42 <sup>*</sup>   |                       |
| Attention to defender $\times$ gender                               | -.27                 | .39       | -.09               |                       |
| Peer victimization $\times$ gender                                  | -.13                 | .17       | -.15               |                       |
| Attention to defender $\times$ peer victimization $\times$ gender   | -1.13                | .49       | -.43 <sup>*</sup>  |                       |

<sup>†</sup>  $p < .10$ . <sup>\*</sup>  $p < .05$ . <sup>\*\*</sup>  $p < .01$ . Each attentional bias was examined in separate models and all outcomes were examined simultaneously.

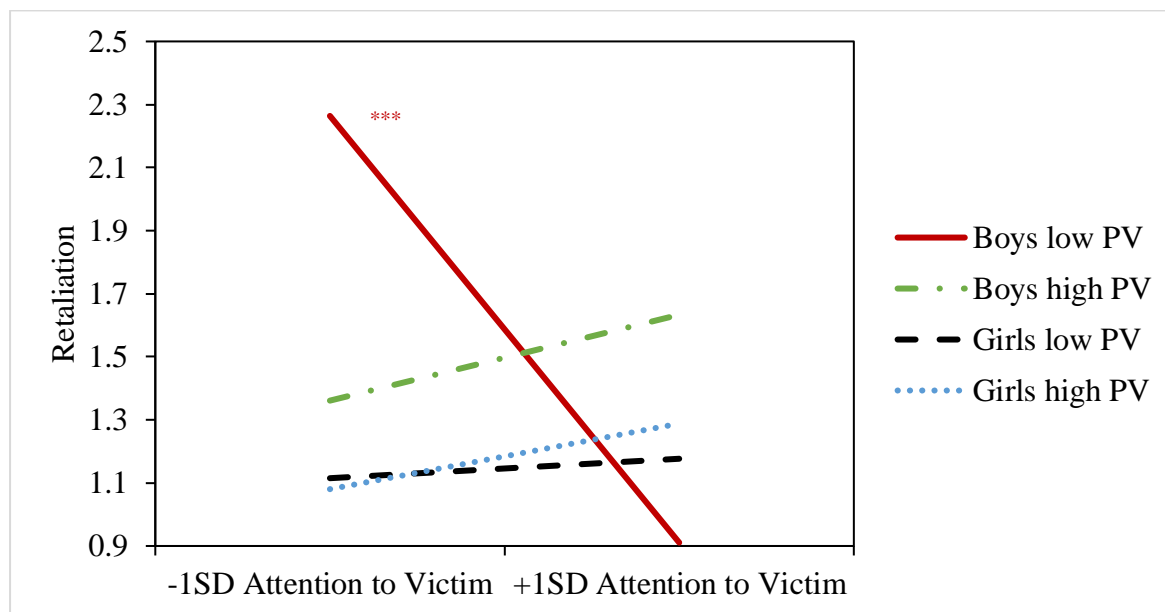

Figure S1. Plot of attention to victim  $\times$  peer victimization  $\times$  gender predicting retaliation
